# Supplementary material
Source: Springer Nature journal article supplement (https://www.springermedizin.de/resource/supplementary/12888_2012_1252_MOESM4_ESM.pdf/9480802)

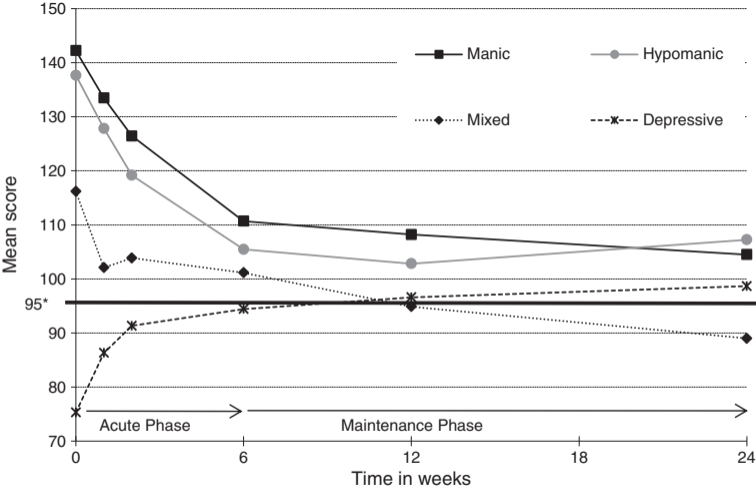

\* 95 corresponds to the middle of the scale to the usual state for each patient when excluding item 5

Supplement: MOESM4 [file 9480802]
